# Supplementary material for: Measures of exposure to the Well London Phase-1 intervention and their association with health well-being and social outcomes
Source: HighWire-hosted journal article supplement (doi:10.1136/jech-2013-202507), 2014-02-10
Supplement: jech-2013-202507supp1.pdf [file jech-2013-202507supp1.pdf]

Quarter of Well London project delivery

|           | Q11         |             |             |             | Q12         |             |             |             | Q13         |             |             |             | Q14         |             |        |        |        |        |        |
|-----------|-------------|-------------|-------------|-------------|-------------|-------------|-------------|-------------|-------------|-------------|-------------|-------------|-------------|-------------|--------|--------|--------|--------|--------|
| Borough A | Dark Purple | Red         | Green       | Light Green | Red         | Green       | Light Green | Orange      | Dark Purple | Green       | Light Green | Yellow      | Orange      | Dark Purple | Red    | Yellow |        |        |        |
| Borough B | Dark Purple | Red         | Orange      | Dark Purple | Red         | Orange      | Dark Purple | Red         | Green       | Dark Purple | Red         | Green       | Dark Purple | Yellow      |        |        |        |        |        |
| Borough C | Dark Purple | Red         | Green       | Light Green | Orange      | Dark Purple | Red         | Green       | Light Green | Orange      | Red         | Green       | Light Green | Red         | Green  |        |        |        |        |
| Borough D | Dark Purple | Red         | Dark Purple | Red         | Orange      | Dark Purple | Red         | Orange      | Dark Purple | Red         | Orange      | Dark Purple | Red         | Yellow      | Yellow | Orange |        |        |        |
| Borough E | Dark Purple | Red         | Green       | Light Green | Orange      | Dark Purple | Red         | Light Green | Orange      | Red         | Light Green | Orange      | Dark Purple | Red         | Orange |        |        |        |        |
| Borough F | Dark Purple | Red         | Green       | Light Green | Orange      | Dark Purple | Red         | Light Green | Orange      | Green       | Light Green | Orange      | Dark Purple | Green       | Orange |        |        |        |        |
| Borough G | Dark Purple | Red         | Green       | Dark Purple | Red         | Green       | Dark Purple | Red         | Green       | Green       | Yellow      |             |             |             |        |        |        |        |        |
| Borough H | Dark Purple | Red         | Orange      | Dark Purple | Green       | Orange      | Dark Purple | Green       | Orange      | Green       | Orange      |             |             |             |        |        |        |        |        |
| Borough I | Dark Purple | Red         | Green       | Orange      | Dark Purple | Red         | Green       | Orange      | Red         | Green       | Orange      | Red         | Green       | Orange      |        |        |        |        |        |
| Borough J | Dark Purple | Red         | Green       | Orange      | Dark Purple | Red         | W.D.T       | Orange      | Dark Purple | Red         | Green       | Yellow      | Orange      | Dark Purple | Yellow | Orange |        |        |        |
| Borough K | Dark Purple | Red         | Green       | Light Green | Orange      | Red         | Green       | Light Green | Orange      | Green       | Light Green | Yellow      | Orange      | Red         | Green  | Yellow | Orange |        |        |
| Borough L | Dark Purple | Red         | Green       | Light Green | Orange      | Dark Purple | Red         | Orange      | Dark Purple | Orange      | Red         | Yellow      | Orange      |             |        |        |        |        |        |
| Borough M | Dark Purple | Red         | W.D.T       | Orange      | Dark Purple | Red         | Orange      | Dark Purple | Yellow      | Orange      | Dark Purple | Green       | Yellow      |             |        |        |        |        |        |
| Borough N | Dark Purple | Red         | Dark Purple | Red         | Light Green | Orange      | Dark Purple | Red         | Light Green | Orange      | Dark Purple | Red         | Green       | Orange      |        |        |        |        |        |
| Borough O | Dark Purple | Red         | Dark Purple | Red         | Green       | Dark Purple | Red         | Green       | Orange      | Red         | Orange      |             |             |             |        |        |        |        |        |
| Borough P | Dark Purple | Red         | Orange      | Dark Purple | Red         | Green       | Orange      | Dark Purple | Red         | Yellow      | Orange      | Green       | Yellow      | Orange      |        |        |        |        |        |
| Borough Q | Dark Purple | Red         | Orange      | Dark Purple | Red         | Orange      | Dark Purple | Red         | Green       | Orange      | Red         | Orange      |             |             |        |        |        |        |        |
| Borough R | Red         | Light Green | Orange      | Dark Purple | Red         | Light Green | Orange      | Dark Purple | Red         | Light Green | Yellow      | Orange      | Dark Purple | Red         | Orange |        |        |        |        |
| Borough S | Dark Purple | Red         | Orange      | Dark Purple | Red         | Green       | Light Green | Orange      | Dark Purple | Red         | Green       | Light Green | Yellow      | Orange      | Red    | Green  | Yellow | Yellow | Orange |
| Borough T | Dark Purple | Red         | Green       | Light Green | Orange      | Dark Purple | Red         | Green       | Light Green | Orange      | Red         | Green       | Light Green | Orange      | Red    | Green  | Orange |        |        |
